# Supplementary material
Source: Springer Nature journal article supplement (https://www.springermedizin.de/resource/supplementary/12877_2012_785_MOESM1_ESM.pdf/9440346)

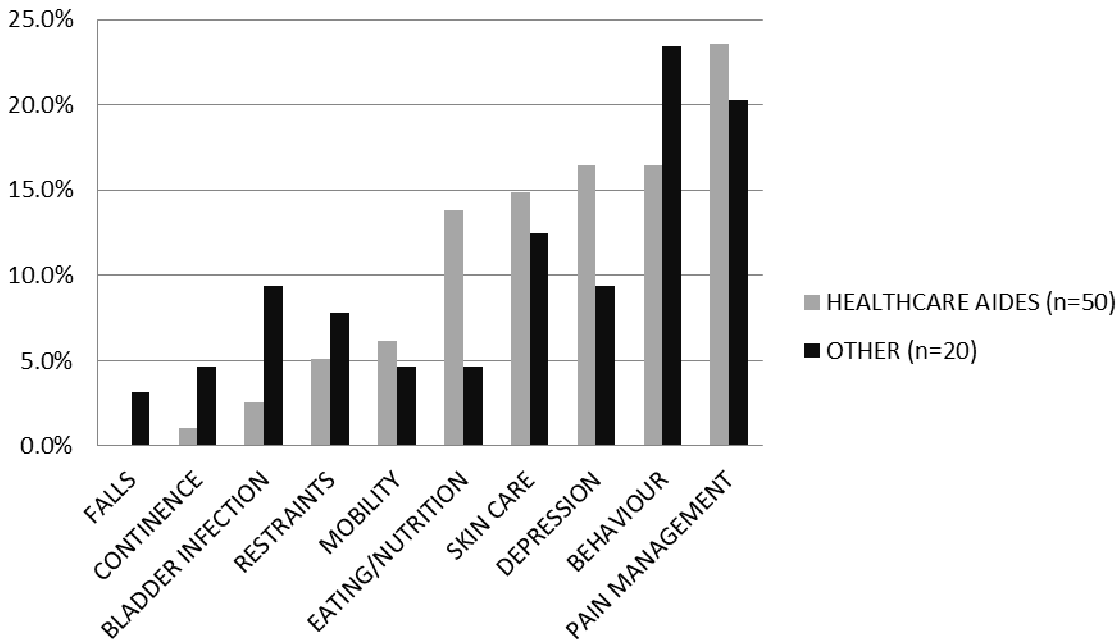

Supplement: MOESM1 [file 9440346]
